# Supplementary material for: Long-term Stroke Recurrence in Atrial Fibrillation: Differential Predictors of Ischaemic and Haemorrhagic Risk
Source: Research Square preprint supplement (doi:10.21203/rs.3.rs-7453175/v1), 2025-10-08
Supplement: Supplementary file 1 [file 48b0e54320043c98e5d49a13.docx]

**Supplementary Figure 1:** Overall cumulative incidence curve for long-term stroke recurrence


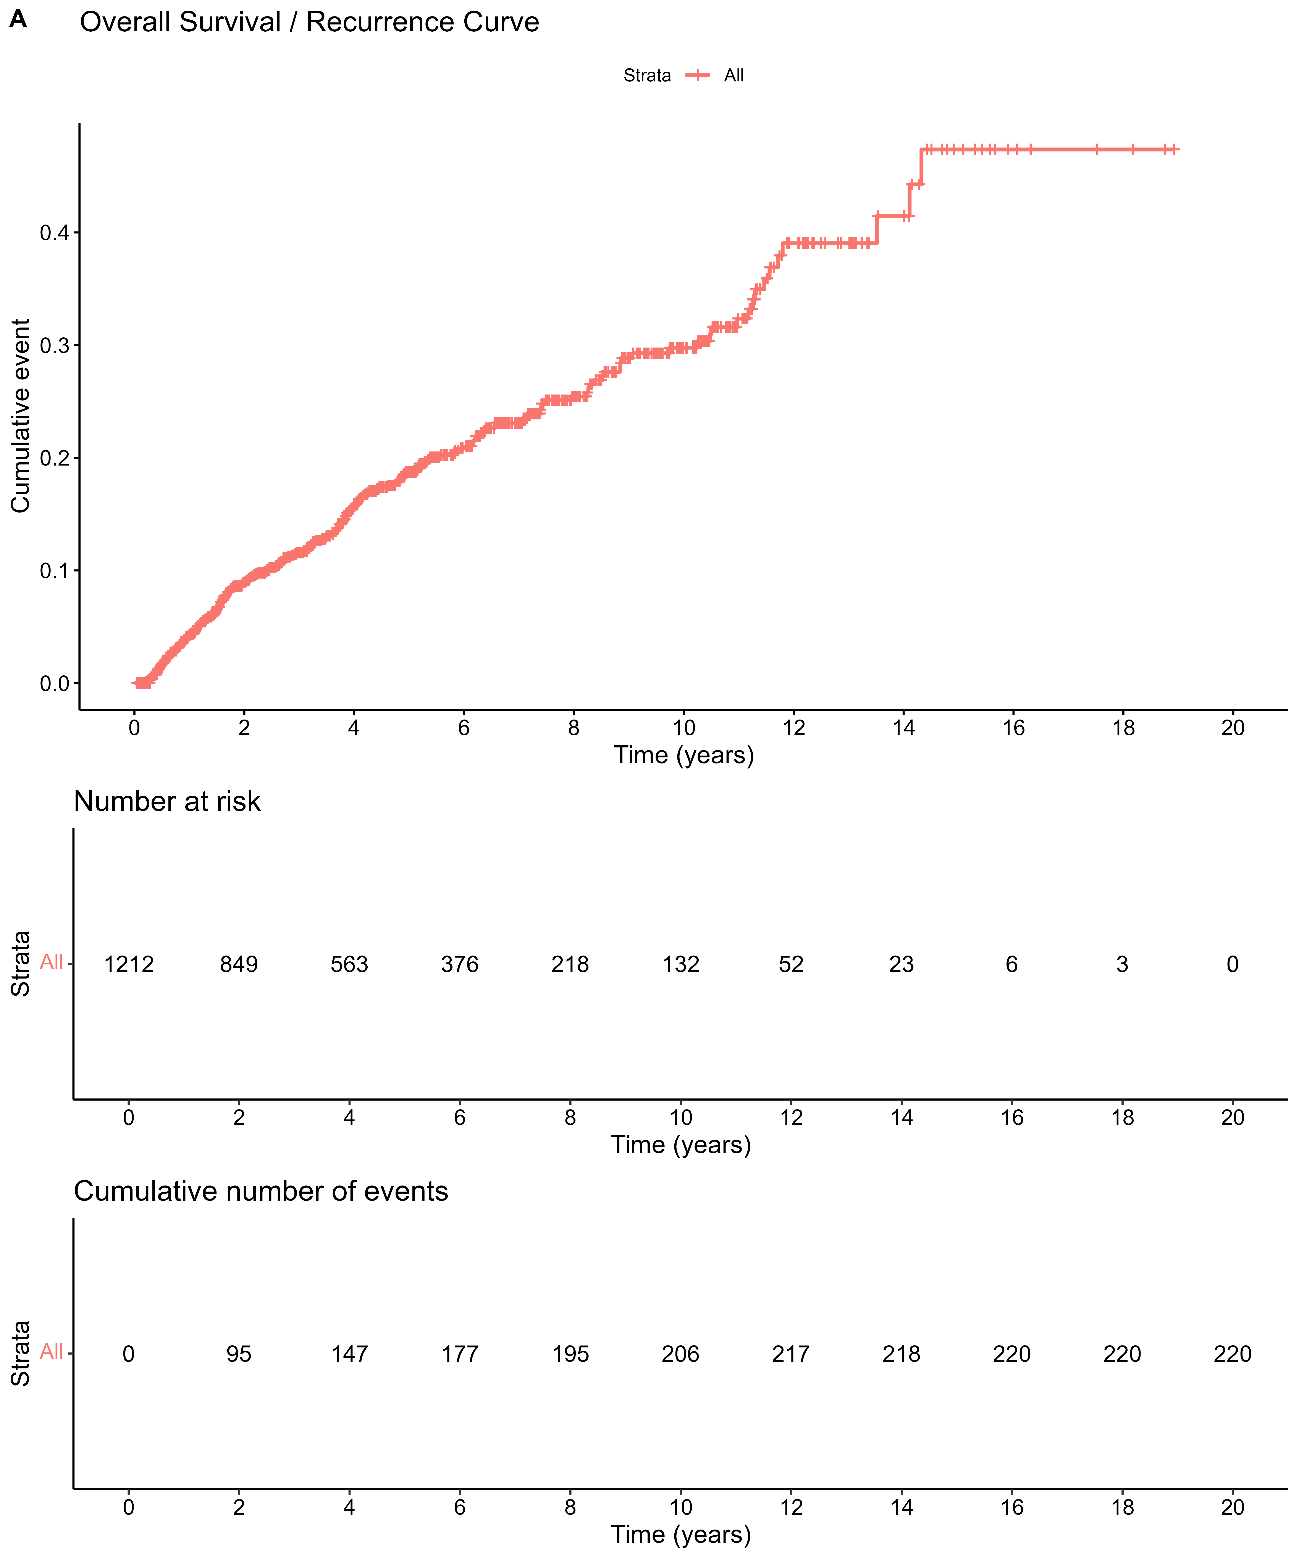


**Legend:** Overall cumulative incidence curve for long-term stroke recurrence in the study cohort. The plot shows the cumulative incidence of recurrent cerebrovascular events (ischaemic stroke, haemorrhagic stroke, or TIA) over the entire follow-up period. The number at risk and cumulative number of events at each time point are displayed below the main curve. Time is shown in years from index stroke to event, censoring, or end of study.

**Supplementary Table S1.** Multivariable Fine–Gray model for ischaemic long-term stroke recurrence

| Variable | sHR (95% CI) | P-value |
| --- | --- | --- |
| Initial Severity | 0.965 (0.941–0.99) | 0,007 |
| CHA2DS2 VASc | 1.024 (0.925–1.135) | 0,644 |
| AF Status: At Stroke Onset | 0.681 (0.434–1.07) | 0,096 |
| AF Status: AFDAS | 0.465 (0.28–0.772) | 0,003 |
| Small Vessel Disease | 1.449 (0.978–2.146) | 0,064 |
| Large Artery Atherosclerosis | 1.976 (1.302–2.999) | 0,001 |
| Anticoagulants Type: VKA | 0.673 (0.463–0.978) | 0,038 |
| Anticoagulants Type: DOAC | 0.538 (0.367–0.789) | 0,002 |

**Legend:** All variables included in the final model are shown. sHR, subdistribution hazard ratio; CI, confidence interval.

**Supplementary Table S2.** Multivariable Fine–Gray model for haemorrhagic long-term stroke recurrence

| Variable | sHR (95% CI) | P-value |
| --- | --- | --- |
| Initial Severity | 0.946 (0.865–1.034) | 0,221 |
| CHA2DS2 VASc | 1.096 (0.813–1.476) | 0,548 |
| AF Status: At Stroke Onset | 0.959 (0.19–4.85) | 0,96 |
| AF Status: AFDAS | 1.506 (0.395–5.747) | 0,549 |
| Small Vessel Disease | 3.236 (1.053–9.944) | 0,04 |
| Large Artery Atherosclerosis | 1.598 (0.366–6.971) | 0,533 |
| Anticoagulants Type: VKA | 1.032 (0.334–3.192) | 0,956 |
| Anticoagulants Type: DOAC | 0.12 (0.014–1.007) | 0,051 |

**Legend:** All variables included in the final model are shown. sHR, subdistribution hazard ratio; CI, confidence interval.
